# Supplementary material
Source: PubMed Central journal article supplement (PMC3707690)
Supplement: supp_M113.473181_jbc.M113.473181-2.pdf [file supp_M113.473181_jbc.M113.473181-2.pdf]

## **SUPPLEMENTARY FIGURE LEGEND**

### **Supplementary Movie 1: Single-cell imaging of the recruitment of the activator and H3.3-YFP to the transgene array in U2OS cells during transcriptional activation.**

The activator, Cherry-tTA-ER, and H3.3-YFP were transiently transfected into U2OS 2-6-3 cells and transcription was induced by the addition of tamoxifen. Frames were collected every 5 min for ~270 min. Movie display rate is 3 frames per second.
